# Supplementary material for: A phase 1 trial of fuzuloparib in combination with apatinib for advanced ovarian and triple-negative breast cancer: efficacy, safety, pharmacokinetics and germline BRCA mutation analysis
Source: Springer Nature journal article supplement (doi:10.1186/s12916-023-03046-8), 2023-09-29
Supplement: MOESM1 [file 26105568]

Supplementary materials

Table S1. Pharmacokinetic parameters of fuzuloparib and apatinib after single dosing.

|                                     |                                | FZPL 40 mg +<br>APTN 250 mg | FZPL 60 mg +<br>APTN 250 mg | FZPL 80 mg +<br>APTN 250 mg | FZPL 100 mg +<br>APTN 250 mg | FZPL 80 mg +<br>APTN 375 mg | FZPL 100 mg +<br>APTN 375 mg | FZPL 100 mg +<br>APTN 500 mg |
|-------------------------------------|--------------------------------|-----------------------------|-----------------------------|-----------------------------|------------------------------|-----------------------------|------------------------------|------------------------------|
| Cycle 0 Day 1 (single dose of FZPL) |                                |                             |                             |                             |                              |                             |                              |                              |
| FZPL                                | T <sub>max</sub> , h           | 3.0 (2.0-4.0)               | 3.0 (2.0-4.0)               | 3.0 (1.2-4.0)               | 3.0 (2.0-4.0)                | 3.0 (1.0-8.0)               | 2.0 (1.0-8.0)                | 2.5 (1.0-7.9)                |
|                                     | C <sub>max</sub> , µg/mL       | 1.6 (34.7)                  | 1.8 (21.1)                  | 2.7 (20.2)                  | 3.2 (23.2)                   | 2.3 (48.0)                  | 3.5 (37.4)                   | 4.0 (33.7)                   |
|                                     | AUC <sub>0-12h</sub> , h*µg/mL | 8.7 (22.7)                  | 12.9 (23.8)                 | 18.8 (23.9)                 | 21.9 (30.7)                  | 16.1 (48.8)                 | 25.3 (37.1)                  | 27.3 (29.1)                  |
| Cycle 0 Day 4 (single dose of APTN) |                                |                             |                             |                             |                              |                             |                              |                              |
| APTN                                | T <sub>max</sub> , h           | 2.5 (1.9-3.0)               | 4.0 (2.0-4.0)               | 3.0 (1.9-3.1)               | 2.5 (2.0-3.0)                | 3.0 (2.0-4.0)               | 3.0 (2.0-4.0)                | 3.0 (1.9-8.2)                |
|                                     | C <sub>max</sub> , µg/mL       | 0.95 (36.5)                 | 0.90 (45.1)                 | 1.0 (28.1)                  | 0.86 (26.9)                  | 0.90 (31.1)                 | 1.2 (40.4)                   | 1.6 (32.6)                   |
|                                     | AUC <sub>0-24h</sub> , h*µg/mL | 6.2 (16.2)                  | 6.5 (38.2)                  | 6.3 (21.4)                  | 5.8 (20.0)                   | 7.1 (28.9)                  | 7.7 (19.9)                   | 11.5 (26.8)                  |
|                                     | AUC <sub>0-∞</sub> , h*µg/mL   | 7.8 (15.6)                  | 9.6 (41.9)                  | 7.6 (29.1)                  | 7.6 (22.6)                   | 9.4 (30.6)                  | 10.8 (24.8)                  | 17.1 (39.6)                  |
| Cycle 1 Day 1 (FZPL + APTN)         |                                |                             |                             |                             |                              |                             |                              |                              |
| FZPL                                | T <sub>max</sub> , h           | 3.0 (1.0-4.0)               | 3.0 (3.0-4.0)               | 3.5 (1.1-8.0)               | 3.5 (1.0-4.0)                | 4.0 (2.0-8.0)               | 3.0 (1.0-8.0)                | 3.0 (2.0-8.0)                |
|                                     | C <sub>max</sub> , µg/mL       | 1.5 (46.0)                  | 1.5 (22.3)                  | 2.8 (27.5)                  | 3.2 (18.1)                   | 2.4 (53.5)                  | 3.5 (28.3)                   | 3.6 (40.6)                   |
|                                     | AUC <sub>0-12h</sub> , h*µg/mL | 8.3 (11.3)                  | 11.9 (24.6)                 | 19.7 (21.0)                 | 22.4 (21.0)                  | 16.9 (52.0)                 | 24.9 (31.3)                  | 26.8 (42.0)                  |
| APTN                                | T <sub>max</sub> , h           | 2.5 (2.0-3.0)               | 3.0 (1.0-3.9)               | 3.0 (2.0-4.0)               | 2.5 (1.1-4.0)                | 3.0 (2.0-8.0)               | 2.0 (1.0-4.0)                | 3.0 (1.0-4.0)                |
|                                     | C <sub>max</sub> , µg/mL       | 0.86 (64.6)                 | 0.68 (35.7)                 | 0.83 (41.7)                 | 0.70 (54.0)                  | 0.79 (37.5)                 | 1.1 (48.4)                   | 1.3 (40.2)                   |
|                                     | AUC <sub>0-24h</sub> , h*µg/mL | 4.3 (27.4)                  | 4.5 (35.4)                  | 4.0 (35.2)                  | 3.6 (29.8)                   | 5.2 (25.1)                  | 6.4 (26.9)                   | 9.1 (33.9)                   |

Data are median (range) or geometric mean (geometric coefficient of variation%). APTN, apatinib; AUC<sub>0-12h</sub>, area under the concentration-time curve from time 0 to 12 h; AUC<sub>0-∞</sub>, area under the concentration-time curve from time 0 to infinity; AUC<sub>0-24h</sub>, area under the concentration-time curve from time 0 to 24 h; C<sub>max</sub>, peak plasma concentration; FZPL, fuzuloparib; T<sub>max</sub>, time to reach C<sub>max</sub>.

Table S2. Pharmacokinetic parameters of fuzuloparib and apatinib after multiple dosing (cycle 2 day 1).

|                                     | FZPL 40 mg +<br>APTN 250 mg | FZPL 60 mg +<br>APTN 250 mg | FZPL 80 mg +<br>APTN 250 mg | FZPL 100 mg +<br>APTN 250 mg | FZPL 80 mg +<br>APTN 375 mg | FZPL 100 mg +<br>APTN 375 mg | FZPL 100 mg +<br>APTN 500 mg |
|-------------------------------------|-----------------------------|-----------------------------|-----------------------------|------------------------------|-----------------------------|------------------------------|------------------------------|
| <b>FZPL</b>                         |                             |                             |                             |                              |                             |                              |                              |
| T <sub>max</sub> , h                | 2.0 (1.0-3.0)               | 3.0 (1.1-4.0)               | 2.5 (1.9-4.0)               | 4.0 (2.0-8.0)                | 3.0 (2.1-4.0)               | 3.0 (1.3-4.0)                | 3.0 (1.0-3.0)                |
| C <sub>max</sub> , µg/mL            | 3.2 (5.5)                   | 3.9 (36.0)                  | 4.9 (16.5)                  | 5.5 (22.3)                   | 4.9 (21.6)                  | 6.2 (40.0)                   | 6.5 (30.4)                   |
| AUC <sub>0-12h</sub> , h*µg/mL      | 22.8 (12.3)                 | 31.1 (33.9)                 | 40.7 (17.9)                 | 48.2 (22.2)                  | 40.8 (19.9)                 | 48.7 (35.6)                  | 54.3 (35.1)                  |
| C <sub>min</sub> , µg/mL            | 1.0 (39.9)                  | 1.7 (42.5)                  | 2.2 (33.2)                  | 2.8 (30.7)                   | 2.3 (24.6)                  | 2.4 (54.9)                   | 2.9 (50.7)                   |
| C <sub>avg</sub> , µg/mL            | 1.9 (12.2)                  | 2.6 (33.9)                  | 3.4 (18.1)                  | 4.0 (22.4)                   | 3.4 (19.6)                  | 4.1 (35.8)                   | 4.6 (35.2)                   |
| Cl <sub>ss</sub> /F, L/h            | 1.8 (12.3)                  | 1.9 (33.9)                  | 2.0 (17.9)                  | 2.1 (22.2)                   | 2.0 (19.9)                  | 2.1 (35.6)                   | 1.8 (35.1)                   |
| DF, %                               | 109.0 (26.0)                | 80.8 (49.9)                 | 76.8 (27.9)                 | 65.2 (38.6)                  | 75.6 (20.7)                 | 83.2 (64.8)                  | 76.3 (26.5)                  |
| R <sub>ac</sub> (C <sub>max</sub> ) | 2.1 (45.5)                  | 2.6 (22.1)                  | 1.8 (25.3)                  | 1.7 (35.7)                   | 2.4 (29.5)                  | 1.8 (35.0)                   | 2.0 (46.8)                   |
| R <sub>ac</sub> (AUC)               | 2.7 (20.9)                  | 2.6 (18.7)                  | 2.1 (21.9)                  | 2.2 (25.6)                   | 2.8 (21.9)                  | 2.0 (26.1)                   | 2.2 (45.4)                   |
| <b>APTIN</b>                        |                             |                             |                             |                              |                             |                              |                              |
| T <sub>max</sub> , h                | 1.5 (1.0-4.0)               | 3.0 (1.1-4.0)               | 2.0 (0.5-2.1)               | 2.0 (2.0-4.0)                | 1.5 (0.0-3.0)               | 2.0 (1.3-3.1)                | 3.0 (1.0-4.0)                |
| C <sub>max</sub> , µg/mL            | 0.71 (65.7)                 | 0.61 (68.3)                 | 0.76 (57.6)                 | 0.54 (32.2)                  | 0.69 (64.5)                 | 0.91 (23.3)                  | 1.2 (41.3)                   |
| AUC <sub>0-24h</sub> , h*µg/mL      | 4.1 (58.5)                  | 3.7 (33.3)                  | 3.4 (41.2)                  | 2.7 (18.2)                   | 4.3 (57.2)                  | 4.5 (24.6)                   | 7.0 (28.8)                   |
| C <sub>min</sub> , µg/mL            | 0.025 (94.4)                | 0.027 (85.6)                | 0.019 (58.4)                | 0.019 (28.2)                 | 0.040 (78.6)                | 0.039 (49.1)                 | 0.052 (63.6)                 |
| C <sub>avg</sub> , µg/mL            | 0.17 (58.4)                 | 0.15 (33.3)                 | 0.14 (41.3)                 | 0.11 (18.2)                  | 0.18 (57.1)                 | 0.19 (24.8)                  | 0.29 (29.1)                  |
| Cl <sub>ss</sub> /F, L/h            | 61.4 (58.5)                 | 68.1 (33.3)                 | 74.3 (41.2)                 | 91.8 (18.2)                  | 87.6 (57.2)                 | 82.6 (24.6)                  | 71.5 (28.8)                  |
| DF, %                               | 404 (16.5)                  | 376 (38.5)                  | 525 (17.8)                  | 458 (25.9)                   | 358 (57.2)                  | 455 (18.3)                   | 400 (33.8)                   |
| R <sub>ac</sub> (C <sub>max</sub> ) | 0.83 (55.5)                 | 0.90 (45.4)                 | 0.92 (46.2)                 | 0.73 (74.4)                  | 0.88 (86.9)                 | 0.92 (63.2)                  | 0.94 (35.9)                  |
| R <sub>ac</sub> (AUC)               | 0.98 (44.7)                 | 0.82 (30.8)                 | 0.79 (26.7)                 | 0.74 (32.5)                  | 0.85 (73.4)                 | 0.68 (43.8)                  | 0.75 (30.9)                  |

Data are median (range) or geometric mean (geometric coefficient of variation%). APTN, apatinib; AUC<sub>0-12h</sub>, area under the concentration-time curve from time 0 to 12 h; AUC<sub>0-24h</sub>, area under the concentration-time curve from time 0 to 24 h; C<sub>avg</sub>, average plasma concentration; Cl<sub>ss</sub>/F, apparent clearance at steady state; C<sub>max</sub>, peak plasma concentration; C<sub>min</sub>, minimum plasma concentration; DF, degree of fluctuation; FZPL, fuzuloparib; T<sub>max</sub>, time to reach C<sub>max</sub>; R<sub>ac</sub>, accumulation ratio.

Table S3. Tumor response in patients with ovarian cancer by germline *BRCA* mutation status.

|                                              | Platinum-sensitive OC                     |                                          | Platinum-resistant OC                     |                                          | All OC*                                   |                                          |
|----------------------------------------------|-------------------------------------------|------------------------------------------|-------------------------------------------|------------------------------------------|-------------------------------------------|------------------------------------------|
|                                              | Germline<br><i>BRCA1/2</i> <sup>mut</sup> | Germline<br><i>BRCA1/2</i> <sup>wt</sup> | Germline<br><i>BRCA1/2</i> <sup>mut</sup> | Germline<br><i>BRCA1/2</i> <sup>wt</sup> | Germline<br><i>BRCA1/2</i> <sup>mut</sup> | Germline<br><i>BRCA1/2</i> <sup>wt</sup> |
| No. of patients                              | n=3                                       | n=7                                      | n=4                                       | n=13                                     | n=8                                       | n=22                                     |
| Best overall response per RECIST v1.1, n (%) |                                           |                                          |                                           |                                          |                                           |                                          |
| Complete response                            | 1 (33.3%)                                 | 3 (42.9%)                                | 1 (25.0%)                                 | 0                                        | 2 (25.0%)                                 | 3 (13.6%)                                |
| Partial response                             | 2 (66.7%)                                 | 2 (28.6%)                                | 1 (25.0%)                                 | 4 (30.8%)                                | 3 (37.5%)                                 | 6 (27.3%)                                |
| Stable disease                               | 0                                         | 1 (14.3%)                                | 2 (50.0%)                                 | 5 (38.5%)                                | 2 (25.0%)                                 | 6 (27.3%)                                |
| Progressive disease                          | 0                                         | 1 (14.3%)                                | 0                                         | 4 (30.8%)                                | 1 (12.5%)                                 | 7 (31.8%)                                |
| Not evaluable                                | 0                                         | 0                                        | 0                                         | 0                                        | 0                                         | 0                                        |
| Confirmed ORR, % (95% CI)                    | 100 (29.2-100)                            | 71.4 (29.0-96.3)                         | 50.0 (6.8-93.2)                           | 30.8 (9.1-61.4)                          | 62.5 (24.5-91.5)                          | 40.9 (20.7-63.6)                         |
| DCR, % (95% CI)                              | 100 (29.2-100)                            | 85.7 (42.1-99.6)                         | 100 (39.8-100)                            | 69.2 (38.6-90.9)                         | 87.5 (47.3-99.7)                          | 68.2 (45.1-86.1)                         |

\* Included 3 patients with platinum-refractory OC. DCR, disease control rate; NR, not reached; OC, ovarian cancer; ORR, objective response rate.
